# Supplementary material for: Yeast Ribonucleotide Reductase Is a Direct Target of the Proteasome and Provides Hyper Resistance to the Carcinogen 4-NQO
Source: MDPI journal article supplement (doi:10.3390/jof9030351), 2023-03-14
Supplement: s1 [file s1]

## Supplementary Data

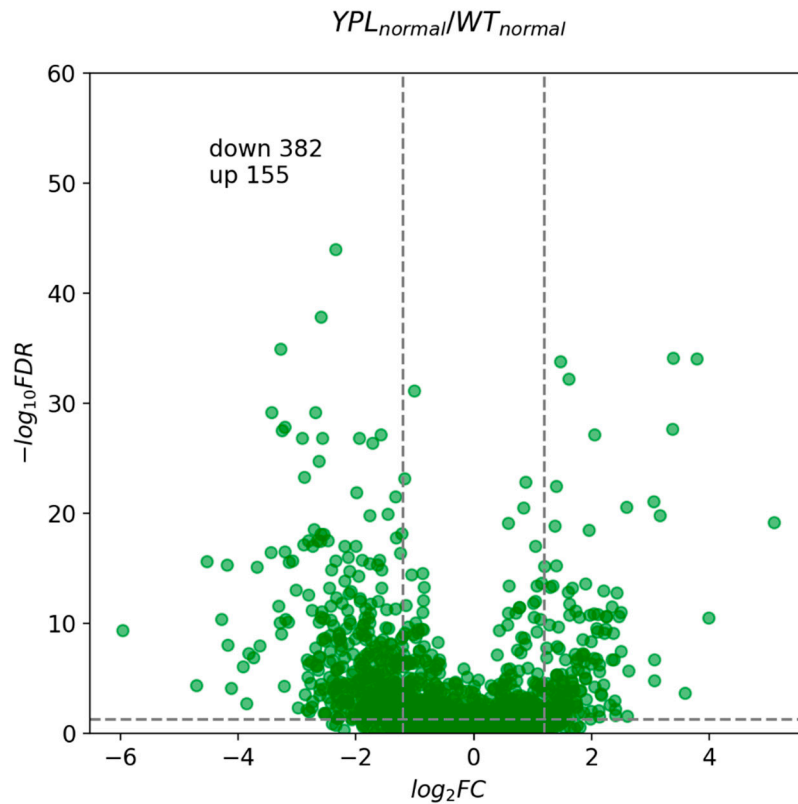

**Figure S1.** Volcano plot for proteins differentially regulated in YPL relative to WT strain. Differentially regulated proteins are selected using the following thresholds:  $|\log_2FC| = 1.2$ ,  $FC = YPL/WT$ ,  $FDR = 0.05$ .

**Table S1.** Oligonucleotides used in this study

| Name        | Sequence (5'-->3')     | Source    |
|-------------|------------------------|-----------|
| RNR1-ex-top | GTTGCTGATATTCCAACCTTG  | This work |
| RNR1-ex-bot | CTATCTAGAGATGGAATAGTTG | -/-       |
| RNR2-ex-top | TGAAAAAGAGAGGTATGATG   | -/-       |
| RNR2-ex-bot | GTCTGGTTTGTTCTTCAAATG  | -/-       |

|                |                                                                        |     |
|----------------|------------------------------------------------------------------------|-----|
| RNR3-ex-top    | TCCAATTTACATTTGACATG                                                   | -/- |
| RNR3-ex-bot    | GGGTACAAAATTCTCTGAAC                                                   | -/- |
| RNR4-ex-top2   | CTGGTAACTATGCTTCTATG                                                   | -/- |
| RNR4-ex-bot2   | GTTTGGCTTGGTTCTCAAATG                                                  | -/- |
| YCP-RNR1-rec-F | GATAACAATTTACACAGGAAACAGCTATGACCA<br>TGATTACGCCGCTTGTTTACGCGTTTTATCC   | -/- |
| RNR1-inside-R  | GGTCAACATAACGGGCAGTGTTATTGAAAACACGAATC<br>ATAGGAATTAAAC                | -/- |
| RNR1-inside-F  | GTTTAATTCCTATGATTCGTGTTTTCAATAACACTGCCC<br>GTTATGTTGACC                | -/- |
| RNR1-3HA-rec-R | CCAGCTGCAGACCCATGACATAACCAATATTAGCCTTTGCA<br>CCCGAACACATTTACAAGC       | -/- |
| RNR1-3HA-rec-F | GATAACAATTTACACAGGAAACAGCTATGACCATGATTACGCCGCTTGT<br>TTACGCGTTTTATCC   | -/- |
| tCYC-YCP-rec-R | GAGCTCGGTACGAGAGAAAAATTCGAGCTCGGTACCCGGGGATCCAGCT<br>TGCAAATTAAAGCCTTC | -/- |
| YCP-RNR2-rec-F | CAATTTACACAGGAAACAGCTATGACCATGATTACGCCAACTATGCGAA<br>ATCCGGAG          | -/- |
| RNR2-3HA-rec-R | CAGCTGCAGACCCATGACATAACCAATATTAGCCTTTGCAAAGTCTTCGTT<br>GAAGGTG         | -/- |

|                |                                                                              |     |
|----------------|------------------------------------------------------------------------------|-----|
| RNR2-3HA-rec-F | CACCTTCAACGAAGACTTTGCAAAGGCTAATATTGGTTATGTCATGGGTC<br>TGCAGCTG               | -/- |
| YCP-RNR3-rec-F | CAATTTACACAGGAAACAGCTATGACCATGATTACGCCAAAAGAAAAGA<br>AAAGAAAGTG              | -/- |
| RNR3-inside-R  | CTTCCTTACCATGTGTTTTTCTGATATCGACAAAGTCGAAGATATC                               | -/- |
| RNR3-inside-F  | GATATCTTCGACTTTGTCTGATATCAGAAAAACACATGGTAAGGAAG                              | -/- |
| RNR3-3HA-rec-R | CAGCTGCAGACCCATGACATAACCAATATTAGCCTTTGCACCGGAACATG<br>ACTCACAAG              | -/- |
| RNR3-3HA-rec-F | CTTGTGAGTCATGTTCCGGTGCAAAGGCTAATATTGGTTATGTCATGGGT<br>CTGCAGCTG              | -/- |
| YCP-RNR4-rec-F | GATAACAATTTACACAGGAAACAGCTATGACCATGATTACGCCGTTCTA<br>GCACACTGAAAGC           | -/- |
| RNR4-3HA-rec-R | CAGCTGCAGACCCATGACATAACCAATATTAGCCTTTGCGAAGTCATCATC<br>AAAGTTAATTC           | -/- |
| RNR4-3HA-rec-F | GAAATTAACCTTTGATGATGACTTCGCAAAGGCTAATATTGGTTATGTCAT<br>GGGTCTGCAGCTG         | -/- |
| SML-LEU-F      | GATCTTACGGTCTCACTAACCTCTCTTCAACTGCTCAATAATTTCCCGCTAA<br>CTGTGGGAATACTCAG     | -/- |
| SML-LEU-R      | CAGAACTAGTGGGAAATGGAAAGAGAAAAGAAAAGAGTATGAAAGGAA<br>CTGTGCAATTCTTTTCC        | -/- |
| YDJ-LEU-F      | TATCCAACTGAATTCTACATCTTCCAACAACAATAATAAACGTCCAAAGA<br>ACTGTGGGAATACTCAGGTATC | -/- |
| YDJ-LEU-R      | GTATGATGAATAAATGAATCGTGAATAAGTTGATCTTTTTTATCAAGAAA<br>AGTGCAATTCTTTTCCTTATC  | -/- |
